# Supplementary material
Source: PubMed Central journal article supplement (PMC4018534)
Supplement: NIHMS576788-supplement-Supplementary_figures.pdf [file NIHMS576788-supplement-Supplementary_figures.pdf]

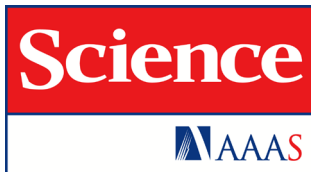

## Supplementary Materials for

### **Polyploids exhibit higher potassium uptake and salinity tolerance in Arabidopsis**

Dai-Yin Chao, Brian Dilkes, Hongbing Luo, Alex Douglas, Elena Yakubova, Brett Lahner, David E Salt.

correspondence to: [david.salt@abdn.ac.uk](mailto:david.salt@abdn.ac.uk)

#### **This PDF file includes:**

Materials and Methods  
Figs. S1, S2  
Tables S1, S2  
Captions for databases S1 to S4

#### **Other Supplementary Materials for this manuscript includes the following:**

Databases S1 – S4 (separate files)  
Additional Data table S1. ICP-MS data for plant samples described in fig. 1 G and fig. S2.  
Additional Data table S2. Survival data for plants described in fig. 2 A.  
Additional Data table S3. ICP-MS data for plant samples described in fig. 2 B & C.  
Additional Data table S4. Seed count data for plants described in fig. 2 E & F.

## **Materials and Methods**

### Plant growth conditions and treatments

Plants for elemental analysis were grown in a controlled environment as previously described (2) unless specially indicated. For experiments assessing survival after NaCl treatment plants were grown in potting mix and irrigated as needed with 0.25-strength Hoagland solution as previously described (2). After 10 days, plants were irrigated weekly with 0.25-strength Hoagland solution supplemented with 200 mM NaCl and the time in days for the above ground portion of each plant to become 100% necrotic after first NaCl treatment recorded as the days-to-death. For experiments assessing fitness after NaCl treatment through seed production two diploid and two tetraploid plants were grown in potting mix in the same pot and irrigated with 0.25-strength Hoagland solution as needed with 5 – 6 pots of plants grown per genotype. After one week plants were irrigated weekly with 0.25-strength Hoagland solution supplemented with 100 mM NaCl. Treatment with NaCl was continued until all plants had finished setting seed. As individual plants matured seeds were collected and pooled by cytotype for each pot, separated from the siliques and counted.

### Elemental analysis

The leaf tissue concentration of Li, B, Na, Mg, P, S, K, Ca, Mn, Fe, Co, Ni, Cu, Zn, As, Se, Rb, Sr, Mo and Cd, were measured by inductively couple plasma mass spectrometry (ICP-MS) as described previously (2). All samples were normalized to calculated weights, as determined with a heuristic algorithm using the best-measured elements, the weights of seven weighed samples, and the solution concentrations, and the method and validation data sets are presented at [www.ionomicshub.org](http://www.ionomicshub.org).

### QTL analysis

QTL analysis was performed using WinQTL Cartographer 2.5 with the composite interval mapping method (8). The genotypic map and the ploidy level for each RIL was obtained from published sources (3,4). Ploidy level was treated as a genetic marker, and a pseudo-linkage group for ploidy was created by adding 4 pseudo-linkage markers for ploidy. The median value of the concentration of each of the quantified elements was used as a trait. 1000 permutations per trait were run to determine the significance level (P=0.01) of the logarithm of the odds ratio (LOD).

### Statistical analysis

Variation in seed production was analysed using a lognormal Poisson generalised linear mixed model (GLMM) with treatment, cytotype, genotype and all interactions between these variables as fixed effects and the pot in which the plants were grown as a random effect. Pot was included as a random effect to account for between pot variability not accounted for by the explanatory variables. A lognormal Poisson GLMM was used in preference to a Poisson GLMM in order to better account for the overdispersed nature of these data. The significance of the fixed effect parameter estimates was assessed using likelihood ratio tests between nested models and model adequacy was determined using standard residual plots. All analysis was conducted using R (Version 2.14.2) (9). Both linear and generalised linear mixed models were fitted using the lme4 package in R (Version 0.999375-42) (10).

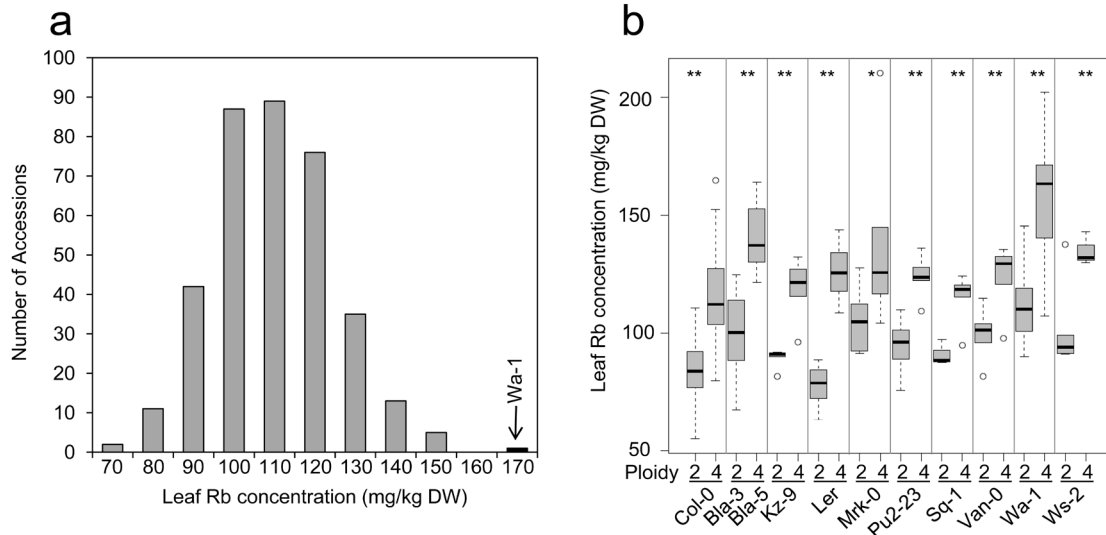

**Fig. S1. Ploidy contributes to Rb accumulation in *A. thaliana* leaves.** (A) Leaf Rb concentration among 349 accessions. Arrow and back bar indicate the tetraploid, Wa-1. (B) Box-plots (the minimum, 1<sup>st</sup> quartile, median, 3<sup>rd</sup> quartile and maximum with data > 1.5 interquartile ranges denoted with circles) for leaf Rb concentration in natural accessions and artificial diploid or tetraploid plants. Asterisks (B) indicate the significance of pair-wise comparisons (Student's *t*-test \*  $p < 0.05$ ; \*\*  $p < 0.01$ ). Data collected from 6 - 12 biological replicates for each accession and cytotype. All leaf Rb concentration data is accessible using the digital object identifier (DOI) 10.4231/T9H41PBV and 10.4231/T93X84K7.

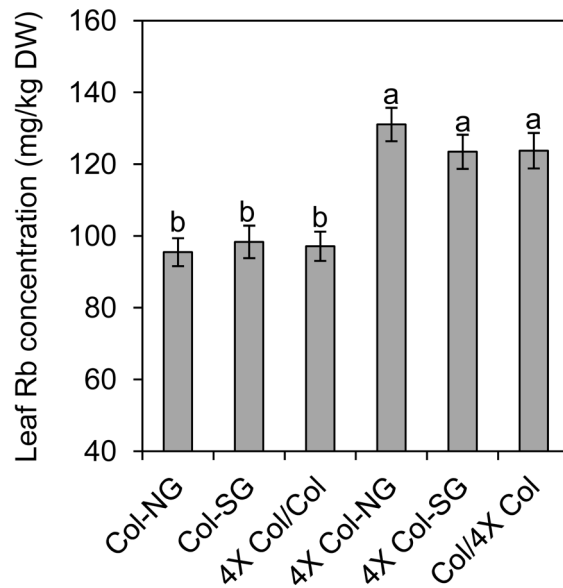

**Fig. S2. Reciprocal grafting establishes that elevated leaf Rb in tetraploids is driven by the ploidy of the root.** Leaf Rb concentration of grafted diploid and tetraploid plants. NG, non-grafted; SG, self-grafted; Col/4xCol, grafted with Col-0 as scion and 4xCol-0 as root stock; 4xCol/Col, grafted with 4xCol-0 as scion and Col-0 as root stock. Letters above bars indicate statistically different groups (one-way ANOVA with groupings by Tukey's HSD with a 95% confidence interval). 2x, diploid; 4x, tetraploid. Data collected from 14 - 18 biological replicates and represented as mean  $\pm$  standard error.

**Table S1.***Arabidopsis thaliana* accessions and their ploidy.

| Name or Stock No. | Native Name   | Origin         | Ploidy |
|-------------------|---------------|----------------|--------|
| 11ME1-32          | 11ME1.32      | USA            | 2x     |
| 11PNA4-101        | 11PNA4.101    | USA            | 2x     |
| 328PNA054         | 328PNA054     | USA            | 2x     |
| 627ME-4Y1         | 627ME-4Y1     | USA            | 2x     |
| CS76409           | Agu-1         | Spain          | 2x     |
| Alc-0             | Alc-0         | Spain          | 2x     |
| ALL1-2            | ALL1-2        | France         | 2x     |
| ALL1-3            | ALL1-3        | France         | 2x     |
| CS28013           | Alst-1        | UK             | 2x     |
| CS28014           | Amel-1        | Netherlands    | 2x     |
| An-1              | An-1          | Belgium        | 2x     |
| CS28017           | An-2          | Belgium        | 2x     |
| CS28018           | Ang-0         | Belgium        | 2x     |
| CS28049           | Ann-1         | France         | 2x     |
| App1-16           | App1-16       | Sweden         | 2x     |
| CS28053           | Ba-1          | UK             | 2x     |
| Bå1-2             | Bå1-2         | Sweden         | 2x     |
| CS28054           | Baa-1         | Netherlands    | 2x     |
| CS22756           | Bak-2         | Kaukasus       | 2x     |
| CS22760           | Bak-7         | Kaukasus       | 2x     |
| CS28063           | Be-1          | Germany        | 2x     |
| Belmonte-4-94     | Belmonte-4-94 | Sweden         | 2x     |
| CS28064           | Benk-1        | Netherlands    | 2x     |
| Bg-2              | Bg-2          | USA            | 2x     |
| CS28081           | Bla-3         | Spain          | 2x     |
| CS28083           | Bla-5         | Spain          | 4x     |
| CS28090           | Blh-2         | Czechoslovakia | 2x     |
| CS28091           | Boot-1        | UK             | 2x     |
| Bor-4             | Bor-4         | Czech          | 2x     |
| Brö1-6            | Brö1-6        | Sweden         | 2x     |
| CS28097           | Bs-2          | Switzerland    | 2x     |
| Bu-0              | Bu-0          | Germany        | 2x     |
| CS28108           | Bu-8          | Germany        | 2x     |
| BUI               | BUI           | France         | 2x     |
| CS28128           | Ca-0          | Germany        | 2x     |
| CAM-16            | CAM-16        | France         | 2x     |
| CAM-61            | CAM-61        | France         | 2x     |
| CS76410           | Cdm-0         | Spain          | 2x     |

|            |            |                |    |
|------------|------------|----------------|----|
| CS28133    | Cha-0      | Switzerland    | 2x |
| CS28135    | Chat-1     | France         | 2x |
| CS28140    | CIBC-2     | UK             | 2x |
| CS28141    | CIBC-4     | UK             | 2x |
| CS76360    | Ciste-2    | Italy          | 4x |
| CLE-6      | CLE-6      | France         | 2x |
| CS28163    | Co-2       | Portugal       | 2x |
| CS28165    | Co-4       | Portugal       | 2x |
| CS28193    | Com-1      | France         | 2x |
| CS28181    | CSHL-5     | USA            | 2x |
| CUR-3      | CUR-3      | France         | 2x |
| CS28201    | Da(1)-12   | Czechoslovakia | 2x |
| CS28200    | Da-0       | Germany        | 2x |
| CS28890    | Del-10     | East Europe    | 2x |
| CS28208    | Di-1       | France         | 2x |
| CS22698    | Dog-4      | Kaukasus       | 2x |
| CS76411    | Don-0      | Spain          | 2x |
| CS28214    | Dra-2      | Czechoslovakia | 2x |
| Dra3-1     | Dra3-1     | Sweden         | 2x |
| DraII-1    | DraII-1    | Czech          | 2x |
| DraIV 1-14 | DraIV 1-14 | Sweden         | 2x |
| DraIV 1-5  | DraIV 1-5  | Sweden         | 2x |
| DraIV 1-7  | DraIV 1-7  | Sweden         | 2x |
| DraIV 6-16 | DraIV 6-16 | Sweden         | 2x |
| DraIV 6-35 | DraIV 6-35 | Sweden         | 2x |
| Duk        | Duk        | Czech          | 2x |
| CS28217    | Ede-1      | Netherlands    | 2x |
| Eden-2     | Eden-2     | Sweden         | 2x |
| CS28241    | Es-0       | Finland        | 2x |
| Est-1      | Est-1      | Estonia        | 2x |
| CS76399    | Ey15-2     | Tuebingen      | 2x |
| Fei-0      | Fei-0      | Portugal       | 2x |
| CS28252    | Fi-1       | Germany        | 2x |
| Fjä1-1     | Fjä1-1     | Sweden         | 2x |
| Fjä1-2     | Fjä1-2     | Sweden         | 2x |
| Fjä1-5     | Fjä1-5     | Sweden         | 2x |
| CS28268    | Fr-4       | Germany        | 2x |
| CS28274    | Ga-2       | Germany        | 2x |
| Ge-0       | Ge-0       | Switzerland    | 2x |
| CS28279    | Gel-1      | Netherlands    | 2x |
| CS28280    | Gie-0      | Germany        | 2x |

|           |           |              |    |
|-----------|-----------|--------------|----|
| Got-7     | Got-7     | Germany      | 2x |
| CS28326   | Gr-5      | Austria      | 2x |
| CS28332   | Gu-1      | Germany      | 2x |
| Gul1-2    | Gul1-2    | Sweden       | 2x |
| CS28344   | Hey-1     | Netherlands  | 2x |
| CS28345   | Hh-0      | Germany      | 2x |
| CS76404   | HKT2.4    | Tuebingen    | 2x |
| CS28350   | Hn-0      | Germany      | 2x |
| Hod       | Hod       | Czech        | 2x |
| Hov4-1    | Hov4-1    | Sweden       | 2x |
| Hovdala-2 | Hovdala-2 | Sweden       | 2x |
| HR-5      | HR-5      | UK           | 2x |
| Hs-0      | Hs-0      | Germany      | 2x |
| HSm       | HSm       | Czech        | 2x |
| CS76373   | ICE1      | East Europe  | 2x |
| CS76423   | ICE102    | Italy        | 2x |
| CS76367   | ICE104    | Italy        | 2x |
| CS76365   | ICE106    | Italy        | 2x |
| CS76364   | ICE107    | Italy        | 2x |
| CS76361   | ICE111    | Italy        | 2x |
| CS76363   | ICE112    | Italy        | 2x |
| CS76424   | ICE119    | Italy        | 2x |
| CS76425   | ICE120    | Italy        | 2x |
| CS76385   | ICE127    | Central Asia | 2x |
| CS76384   | ICE130    | Central Asia | 2x |
| CS76383   | ICE134    | Central Asia | 2x |
| CS76426   | ICE138    | Central Asia | 2x |
| CS76379   | ICE150    | Central Asia | 2x |
| CS76380   | ICE152    | Central Asia | 2x |
| CS76381   | ICE153    | Central Asia | 2x |
| CS76353   | ICE163    | Tyrol        | 2x |
| CS76357   | ICE169    | Tyrol        | 2x |
| CS76358   | ICE173    | Tyrol        | 2x |
| CS76354   | ICE181    | Tyrol        | 2x |
| CS76370   | ICE21     | East Europe  | 2x |
| CS76355   | ICE212    | Tyrol        | 2x |
| CS76351   | ICE216    | Tyrol        | 2x |
| CS76349   | ICE226    | Tyrol        | 2x |
| CS76419   | ICE29     | East Europe  | 2x |
| CS76372   | ICE33     | East Europe  | 2x |
| CS76369   | ICE36     | East Europe  | 2x |

|               |               |                |    |
|---------------|---------------|----------------|----|
| CS76347       | ICE49         | Spain          | 2x |
| CS76348       | ICE50         | Spain          | 2x |
| CS76377       | ICE60         | Russia         | 2x |
| CS76378       | ICE61         | Russia         | 2x |
| CS76420       | ICE63         | East Europe    | 2x |
| CS76371       | ICE7          | East Europe    | 2x |
| CS76421       | ICE70         | Russia         | 2x |
| CS76375       | ICE71         | Russia         | 2x |
| CS76374       | ICE72         | Russia         | 2x |
| CS76376       | ICE73         | Russia         | 2x |
| CS76422       | ICE75         | Russia         | 2x |
| CS76352       | ICE79         | Tyrol          | 2x |
| CS76362       | ICE91         | Italy          | 2x |
| CS76366       | ICE92         | Italy          | 2x |
| CS76368       | ICE93         | Italy          | 2x |
| CS76359       | ICE97         | Italy          | 2x |
| CS22730       | Istisu-1      | Kaukasus       | 2x |
| CS28364       | Je-0          | Germany        | 2x |
| JEA           | JEA           | France         | 2x |
| CS28369       | Jl-3          | Czechoslovakia | 2x |
| CS28373       | Jm-1          | Czechoslovakia | 2x |
| Ka-0          | Ka-0          | Austria        | 2x |
| CS22807       | Kastel-1      | East Europe    | 2x |
| KBS-Mac-8     | KBS-Mac-8     | USA            | 2x |
| CS28382       | Kelsterbach-2 | Germany        | 2x |
| Kelsterbach-4 | Kelsterbach-4 | Germany        | 2x |
| CS28394       | Kl-5          | Germany        | 2x |
| CS28395       | Kn-0          | Lithuania      | 2x |
| CS28407       | KNO-11        | USA            | 2x |
| Kno-18        | Kno-18        | USA            | 2x |
| CS22823       | Koch-1        | East Europe    | 2x |
| Köln          | Köln          | Germany        | 2x |
| CS28423       | Krot-2        | Germany        | 2x |
| Kulturen-1    | Kulturen-1    | Sweden         | 2x |
| LAC-3         | LAC-3         | France         | 2x |
| LAC-5         | LAC-5         | France         | 2x |
| CS22747       | Lag2.2        | Kaukasus       | 2x |
| LDV-25        | LDV-25        | France         | 2x |
| LDV-34        | LDV-34        | France         | 2x |
| LDV-58        | LDV-58        | France         | 2x |
| CS76413       | Leo-1         | Spain          | 2x |



|            |            |             |    |
|------------|------------|-------------|----|
| CS22712    | Lerik1-3   | Kaukasus    | 2x |
| CS28457    | Li-5:2     | Germany     | 2x |
| CS28459    | Li-6       | Germany     | 2x |
| CS28461    | Li-7       | Germany     | 2x |
| Liarum     | Liarum     | Sweden      | 2x |
| Lillö-1    | Lillö-1    | Sweden      | 2x |
| LI-OF-095  | LI-OF-095  | USA         | 2x |
| Lis-1      | Lis-1      | Sweden      | 2x |
| Lis-2      | Lis-2      | Sweden      | 2x |
| Lisse      | Lisse      | Netherlands | 2x |
| Lom1-1     | Lom1-1     | Sweden      | 2x |
| Lp2-6      | Lp2-6      | Czech       | 2x |
| Lund       | Lund       | Sweden      | 2x |
| Map-42     | Map-42     | USA         | 2x |
| CS28490    | Mc-0       | UK          | 2x |
| CS76414    | Mer-6      | Spain       | 2x |
| MIB-15     | MIB-15     | France      | 2x |
| MIB-22     | MIB-22     | France      | 2x |
| MIB-28     | MIB-28     | France      | 2x |
| MIB-84     | MIB-84     | France      | 2x |
| MNF-Che-2  | MNF-Che-2  | USA         | 2x |
| MNF-Jac-32 | MNF-Jac-32 | USA         | 2x |
| MNF-Pot-48 | MNF-Pot-48 | USA         | 2x |
| MNF-Pot-68 | MNF-Pot-68 | USA         | 2x |
| MOG-37     | MOG-37     | France      | 2x |
| Mr-0       | Mr-0       | Italy       | 2x |
| Mz-0       | Mz-0       | Germany     | 2x |
| CS28510    | N4         | Russia      | 2x |
| CS28513    | N7         | Russia      | 2x |
| NC-6       | NC-6       | USA         | 2x |
| CS28917    | Nemrut-1   | Kaukasus    | 2x |
| NFA-10     | NFA-10     | UK          | 2x |
| NFA-8      | NFA-8      | UK          | 2x |
| CS28550    | NFC-20     | UK          | 2x |
| CS76402    | Nie1-2     | Tuebingen   | 2x |
| CS28564    | No-0       | Germany     | 2x |
| CS28568    | Nok-1      | Netherlands | 2x |
| CS28573    | Nw-0       | Germany     | 2x |
| CS28575    | Nw-2       | Germany     | 2x |
| CS28578    | Nz1        | New Zealand | 2x |
| CS28580    | Ob-1       | Germany     | 2x |

|          |           |                |    |
|----------|-----------|----------------|----|
| CS28583  | Old-1     | Germany        | 2x |
| CS28587  | Or-0      | Germany        | 2x |
| CS28849  | Ors-2     | Romania        | 2x |
| Pa-1     | Pa-1      | Italy          | 2x |
| CS28595  | Pa-2      | Italy          | 2x |
| PAR-3    | PAR-3     | France         | 2x |
| PAR-4    | PAR-4     | France         | 2x |
| PAR-5    | PAR-5     | France         | 2x |
| Paw-3    | Paw-3     | USA            | 2x |
| CS76415  | Ped-0     | Spain          | 2x |
| Pent-1   | Pent-1    | USA            | 2x |
| Petergof | Petergof  | Russia         | 2x |
| CS28610  | PHW-10    | UK             | 2x |
| CS28613  | PHW-13    | UK             | 2x |
| CS28614  | PHW-14    | UK             | 2x |
| CS28620  | PHW-20    | UK             | 2x |
| CS28622  | PHW-22    | UK             | 2x |
| CS28628  | PHW-28    | UK             | 2x |
| CS28631  | PHW-31    | UK             | 2x |
| CS28633  | PHW-33    | Netherlands    | 2x |
| PHW-34   | PHW-34    | France         | 2x |
| CS28635  | PHW-35    | France         | 2x |
| CS28636  | PHW-36    | France         | 2x |
| CS28637  | PHW-37    | France         | 2x |
| CS28645  | Pn-0      | France         | 2x |
| CS28650  | Pog-0     | Canada         | 2x |
| CS28651  | Pr-0      | Germany        | 2x |
| CS76416  | Pra-6     | Spain          | 2x |
| Pro-0    | Pro-0     | Spain          | 2x |
| Pu2-23   | Pu2-23    | Czech          | 2x |
| CS28663  | Pu2-24    | Czechoslovakia | 2x |
| CS76417  | Qui-0     | Spain          | 2x |
| Rak-2    | Rak-2     | Czech          | 2x |
| Ren-1    | Ren-1     | France         | 2x |
| Rev-2    | Rev-2     | Sweden         | 2x |
| CS28685  | Rhen-1    | Netherlands    | 2x |
| ROM-1    | ROM-1     | France         | 2x |
| CS28692  | Rou-0     | France         | 2x |
| Rsch-4   | Rsch-4    | Russia         | 2x |
| CS76406  | Rue3-1-31 | Tuebingen      | 2x |
| CS28720  | S96       | Netherlands    | 2x |

|            |            |              |    |
|------------|------------|--------------|----|
| Sanna-2    | Sanna-2    | Sweden       | 2x |
| Sap-0      | Sap-0      | Czech        | 2x |
| CS28724    | Sapporo-0  | Japan        | 2x |
| Sav-0      | Sav-0      | Czech        | 2x |
| CS28729    | Sei-0      | Italy        | 2x |
| Sei-0      | Sg-1       | Germany      | 2x |
| CS28734    | Sh-0       | Germany      | 2x |
| CS76382    | Sha        | Central Asia | 2x |
| CS28739    | Si-0       | Germany      | 2x |
| SLSP-30    | SLSP-30    | USA          | 2x |
| CS28743    | Sp-0       | Germany      | 2x |
| Sparta-1   | Sparta-1   | Sweden       | 2x |
| Sq-8       | Sq-8       | UK           | 2x |
| CS76400    | Star-8     | Tuebingen    | 2x |
| Ste-3      | Ste-3      | USA          | 2x |
| T1040      | T1040      | Sweden       | 2x |
| T1060      | T1060      | Sweden       | 2x |
| T1080      | T1080      | Sweden       | 2x |
| T1110      | T1110      | Sweden       | 2x |
| T510       | T510       | Sweden       | 2x |
| T540       | T540       | Sweden       | 2x |
| T620       | T620       | Sweden       | 2x |
| T690       | T690       | Sweden       | 2x |
| TÅD 01     | TÅD 01     | Sweden       | 2x |
| TDr-1      | TDr-1      | Sweden       | 2x |
| TDr-17     | TDr-17     | Sweden       | 2x |
| TDr-18     | TDr-18     | Sweden       | 2x |
| TDr-3      | TDr-3      | Sweden       | 2x |
| TDr-8      | TDr-8      | Sweden       | 2x |
| CS28759    | Ting-1     | Sweden       | 2x |
| CS28760    | Tiv-1      | Italy        | 2x |
| Tomegap-2  | Tomegap-2  | Sweden       | 2x |
| Tottarp-2  | Tottarp-2  | Sweden       | 2x |
| TOU-A1-115 | TOU-A1-115 | France       | 2x |
| TOU-A1-116 | TOU-A1-116 | France       | 2x |
| TOU-A1-12  | TOU-A1-12  | France       | 2x |
| TOU-A1-43  | TOU-A1-43  | France       | 2x |
| TOU-A1-62  | TOU-A1-62  | France       | 2x |
| TOU-A1-67  | TOU-A1-67  | France       | 2x |
| TOU-A1-96  | TOU-A1-96  | France       | 2x |
| TOU-C-3    | TOU-C-3    | France       | 2x |

|            |            |             |    |
|------------|------------|-------------|----|
| TOU-E-11   | TOU-E-11   | France      | 2x |
| TOU-H-12   | TOU-H-12   | France      | 2x |
| TOU-H-13   | TOU-H-13   | France      | 2x |
| TOU-I-17   | TOU-I-17   | France      | 2x |
| TOU-I-2    | TOU-I-2    | France      | 2x |
| TOU-I-6    | TOU-I-6    | France      | 2x |
| TOU-J-3    | TOU-J-3    | France      | 2x |
| TOU-K-3    | TOU-K-3    | France      | 2x |
| CS28779    | Tscha-1    | Austria     | 2x |
| CS76403    | TueSB30-3  | Tuebingen   | 2x |
| CS76401    | Tuescha9   | Tuebingen   | 2x |
| CS76407    | TueV13     | Tuebingen   | 2x |
| CS76405    | TueWa1-2   | Tuebingen   | 2x |
| CS28788    | Uk-2       | Germany     | 2x |
| UKID101    | UKID101    | UK          | 2x |
| UKID22     | UKID22     | UK          | 2x |
| UKID37     | UKID37     | UK          | 2x |
| UKID48     | UKID48     | UK          | 2x |
| UKID80     | UKID80     | UK          | 2x |
| UKNW06-059 | UKNW06-059 | UK          | 2x |
| UKNW06-060 | UKNW06-060 | UK          | 2x |
| UKNW06-386 | UKNW06-386 | UK          | 2x |
| UKNW06-436 | UKNW06-436 | UK          | 2x |
| UKNW06-460 | UKNW06-460 | UK          | 2x |
| UKSE06-062 | UKSE06-062 | UK          | 2x |
| UKSE06-192 | UKSE06-192 | UK          | 2x |
| UKSE06-272 | UKSE06-272 | UK          | 2x |
| UKSE06-278 | UKSE06-278 | UK          | 2x |
| UKSE06-349 | UKSE06-349 | UK          | 2x |
| UKSE06-351 | UKSE06-351 | UK          | 2x |
| UKSE06-414 | UKSE06-414 | UK          | 2x |
| UKSE06-466 | UKSE06-466 | UK          | 2x |
| UKSE06-482 | UKSE06-482 | UK          | 2x |
| UKSE06-520 | UKSE06-520 | UK          | 2x |
| UKSE06-628 | UKSE06-628 | UK          | 2x |
| UKSW06-202 | UKSW06-202 | UK          | 2x |
| UII2-3     | UII2-3     | Sweden      | 2x |
| UII2-5     | UII2-5     | Sweden      | 2x |
| UII3-4     | UII3-4     | Sweden      | 2x |
| CS28795    | Utrecht    | Netherlands | 2x |
| Vår2-1     | Vår2-1     | Sweden      | 2x |

|           |           |             |    |
|-----------|-----------|-------------|----|
| CS22754   | Vash-1    | Kaukasus    | 2x |
| CS28800   | Ven-1     | Netherlands | 2x |
| CS76418   | Vie-0     | Spain       | 2x |
| VOU-1     | VOU-1     | France      | 2x |
| VOU-2     | VOU-2     | France      | 2x |
| CS28808   | Wag-3     | Netherlands | 2x |
| CS28809   | Wag-4     | Netherlands | 2x |
| CS28810   | Wag-5     | Netherlands | 2x |
| CS76408   | WalhaesB4 | Tuebingen   | 2x |
| CS28814   | Wc-2      | Germany     | 2x |
| CS28823   | Ws        | Russia      | 2x |
| Ws-0      | Ws-0      | Ukraine     | 2x |
| CS28833   | Wt-3      | Germany     | 2x |
| CS22703   | Xan-1     | Kaukasus    | 2x |
| CS22765   | Yeg-1     | Kaukasus    | 2x |
| Zdr-6     | Zdr-6     | Czech       | 2x |
| ZdrI 2-24 | ZdrI 2-24 | Sweden      | 2x |
| ZdrI 2-25 | ZdrI 2-25 | Sweden      | 2x |
| CS28847   | Zu-1      | Switzerland | 2x |

---

**Table S2.**

Model selection procedure and associated summary statistics used to analyse the seed production data with a lognormal Poisson GLMM.  $\Delta$ AIC: change in Akaike Information Criterion between nested models, LRT: Likelihood ratio test statistic, DF: difference in degrees of freedom between nested models, P value: p value associated with model term removed. Model hierarchy was respected when considering terms to be removed and therefore all main effects contained in second-order interactions were retained. Nested models with different fixed effects were fitted using maximum likelihood.

| Model                                                                                                                                  | $\Delta$ AIC | LRT   | DF | P value |
|----------------------------------------------------------------------------------------------------------------------------------------|--------------|-------|----|---------|
| <b>Full model</b>                                                                                                                      |              |       |    |         |
| <i>genotype + cytotype + salinity +<br/>genotype:cytotype + cytotype:salinity + genotype:salinity +<br/>genotype:cytotype:salinity</i> | -            | -     | -  | -       |
| <b>Model terms removed</b>                                                                                                             |              |       |    |         |
| <i>genotype:cytotype:salinity</i>                                                                                                      | - 3.87       | 0.14  | 2  | 0.934   |
| <i>genotype:cytotype</i>                                                                                                               | - 3.46       | 0.53  | 2  | 0.764   |
| <i>genotype:salinity</i>                                                                                                               | 2.11         | 6.11  | 2  | 0.051   |
| <i>cytotype:salinity</i>                                                                                                               | 28.03        | 30.03 | 1  | < 0.001 |
| <i>genotype</i>                                                                                                                        | 22.08        | 26.08 | 2  | < 0.001 |
| <b>Final model</b>                                                                                                                     |              |       |    |         |
| <i>genotype + cytotype + salinity + cytotype:salinity</i>                                                                              | -            | -     | -  | -       |

**Additional Data table S1 (separate file)**

ICP-MS data for plant samples described in fig. 1 G and fig. S2.

**Additional Data table S2 (separate file)**

Survival data for plants described in fig 2 A.

**Additional Data table S3 (separate file)**

ICP-MS data for plant samples described in fig 2 B & C.

**Additional Data table S4 (separate file)**

Seed count data for plants described in fig 2 E & F.
